# Supplementary material
Source: MDPI journal article supplement (doi:10.3390/foods15050895)
Supplement: s1 [file Supporting Figures.pdf › Supporting Figures.pdf]

## **Supplementary Material**

### **Supplemental Figures S1-S2**

**Article title:** Effects of Different Drying Methods on Nutritional Compositions, Bioactive Substances, and Volatile Compounds of Radish (*Raphanus sativus* L.) Leaves

**Authors:** Zihao Wei 1,†, Xianxian Liu 1,†, Qingmin Chen 2, Wenling Xu 1, Lichun Chang 1, Chen Liu 1,\* and Shufen Wang 1,\*

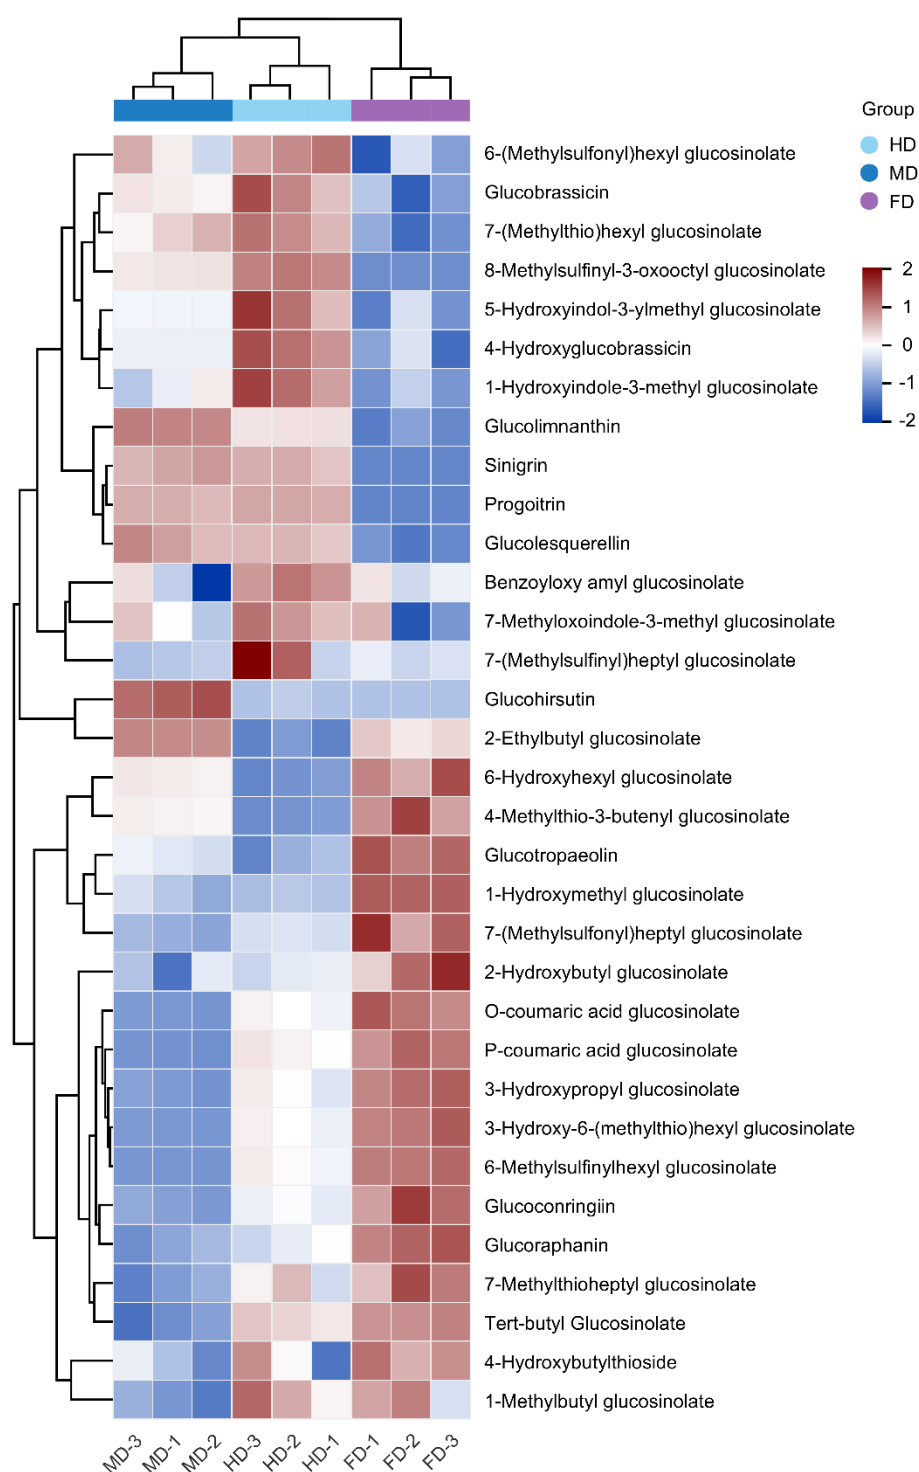

**Figure S1. Clustering heatmap analysis of glucosinolates in radish leaves subjected to different drying methods.**

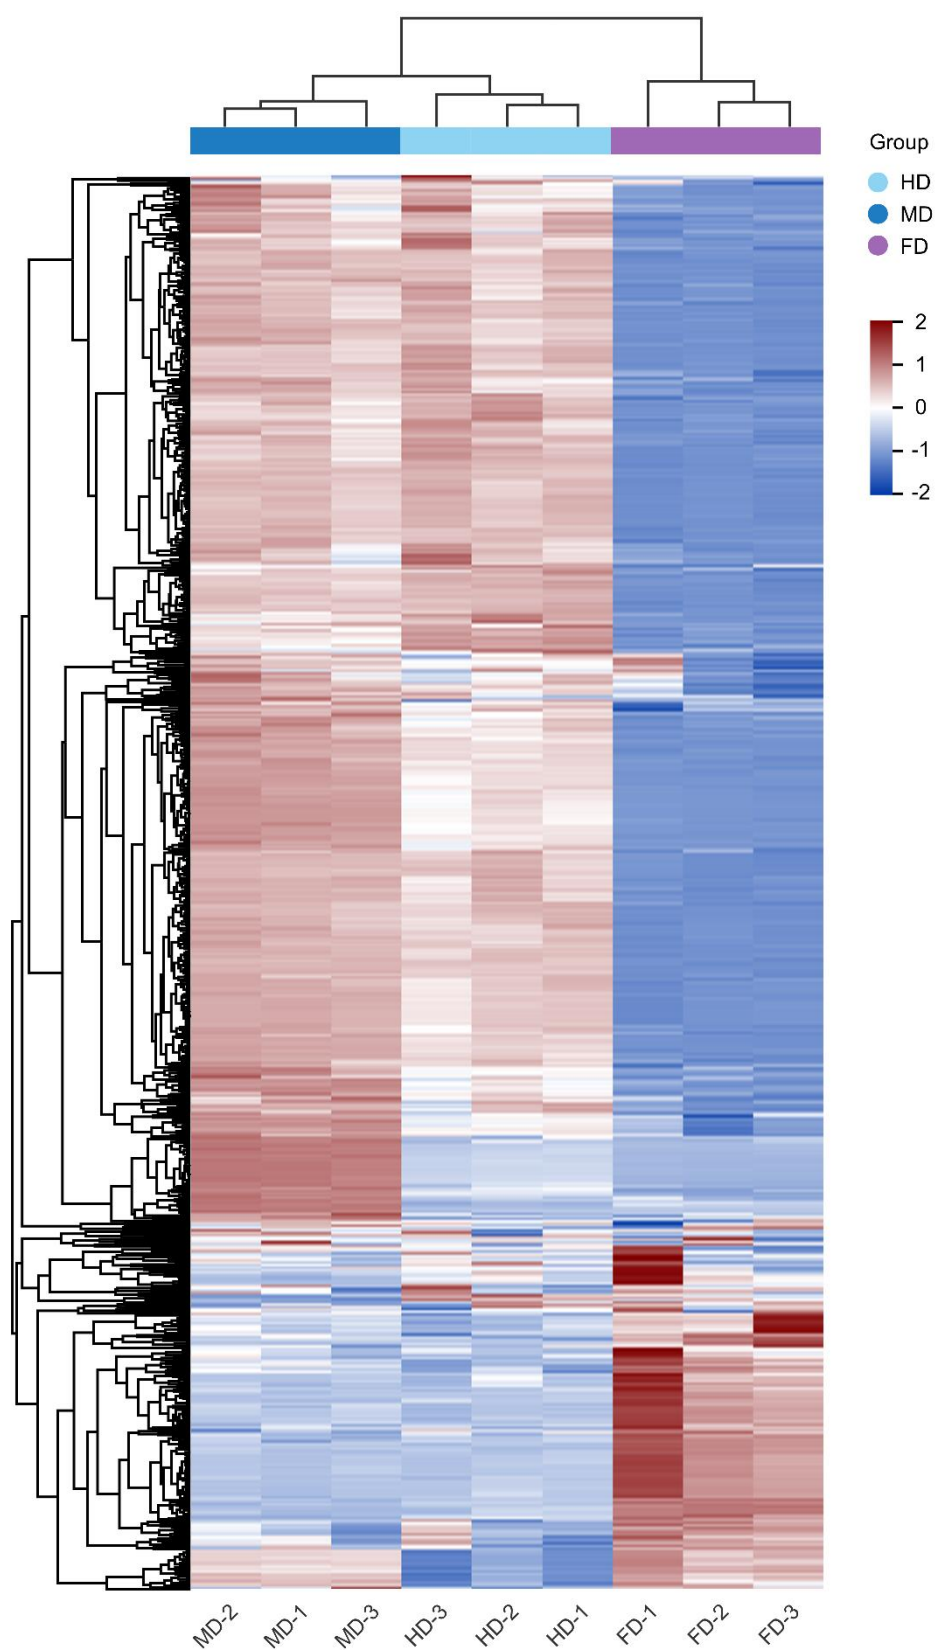

**Figure S2. Clustering heatmap analysis of volatile compounds in radish leaves subjected to different drying methods.**
